# Supplementary material for: The effective removal of Cr(vi) ions by carbon dot–silica hybrids driven by visible light
Source: Royal Society of Chemistry journal article supplement (doi:10.1039/c6ra13593e), 2016-01-01
Supplement: c6ra13593e1.pdf [file c6ra13593e1.pdf]

# Cr(VI) ions effective abatement on carbon dots-silica hybrids driven by visible light

Yun Liu,<sup>a</sup> Yu-jie Ma,<sup>a,b</sup> Chun-yan Liu,<sup>\*a</sup> Zhi-ying Zhang,<sup>a</sup> Wen-dong Yang,<sup>a</sup> Shi-dong Nie,<sup>a</sup> Xue-hua Zhou<sup>b</sup>

<sup>a</sup> Key Laboratory of Photochemical Conversion and Optoelectronic Materials, Technical Institute of Physics and Chemistry, Chinese Academy of Sciences, Beijing 100190, People's Republic China.

<sup>b</sup> Environment Research Institute, Shandong University, Jinan, 250100, P.R. China

## Supporting Materials

### 1. Fluorescence of carbon dots-silica hybrids

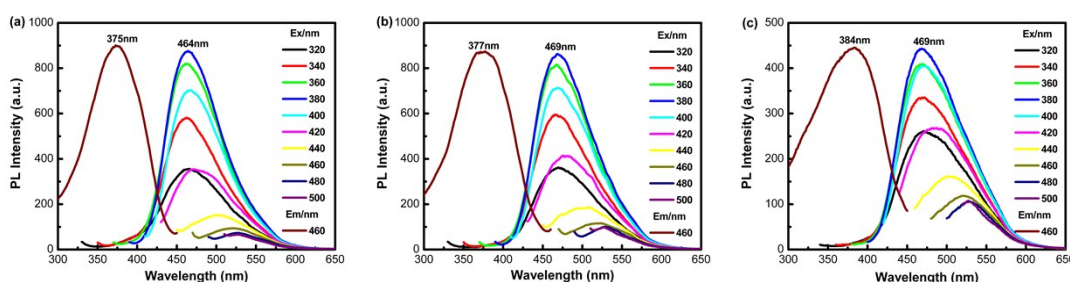

Fig. S1 Emission and excitation spectra of CDs-Si-H2 (a), CDs-Si-H3 (b) and CDs-Si-H4 (c)

in aqueous solutions at different excitation wavelengths.

With the increase of carbon dots concentration in silica matrix, the optimal excitation and emission wavelength was red shift obviously.

### 2. FT-IR spectra of different samples of CDs-Si-H

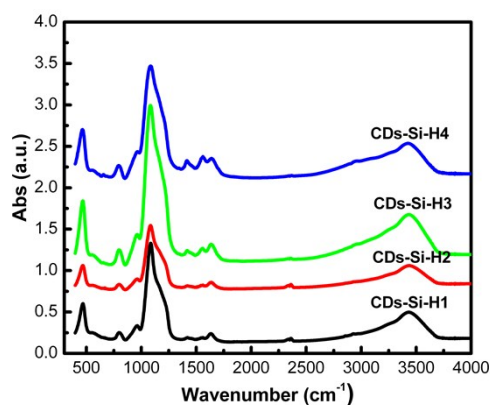

Fig. S2 FT-IR spectra of different CDs-Si-H samples

\* Corresponding author: Tel: +86 10 82543573; Fax: +86 10 82543573. E-mail address:

[cylu@mail.ipc.ac.cn](mailto:cylu@mail.ipc.ac.cn)

### 3. XPS analysis of different CDs-Si-H samples

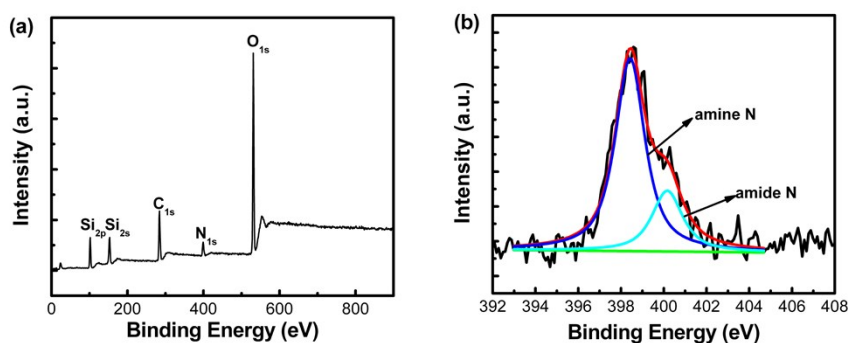

**Fig. S3** XPS survey (a) and high-resolution N<sub>1s</sub> spectra (b) of CDs-Si-H4

with the identification of peaks by curve fitting

**Table S1** Nitrogen surface concentration in different CDs-Si-H samples

| samples                         | CDs-Si-H1 | CDs-Si-H2 | CDs-Si-H3 | CDs-Si-H4 |
|---------------------------------|-----------|-----------|-----------|-----------|
| Nitrogen atomic concentration % | 2.37      | 4.00      | 5.18      | 6.30      |

### 4. The investigation on the adsorption property of different CDs-Si-H samples to Cr(VI)

Two typical absorption bands centered at 351.5 and 257.5 nm with a small shoulder shorter than 500 nm appeared in the UV-Vis absorption spectrum of Cr(VI) aqueous solution (pH ~ 3). To evaluate the adsorption capacity of different photocatalysts to Cr(VI), the absorption changes at 350 nm of Cr(VI) after sonication and stirring were recorded (Fig. S4). In a typical procedure, a certain amount of Cr(VI) aqueous solution was first added into a photocatalyst dispersion. After sonication for 20min, adjusted the solution pH to 3 with 0.1 M HCl aqueous solution and the concentration of Cr(VI) and photocatalysts were respectively maintained at  $8 \times 10^{-4}$  mol/L and 1g/L. The solution was stirred in dark. 5 ml of the solution was taken in a certain interval of time, and then centrifuged and recorded the UV-Vis absorption of supernatants. The absorbance at 350nm was used to evaluate the residual Cr(VI) in the system and then the adsorptive ability of the photocatalysts to Cr(VI).

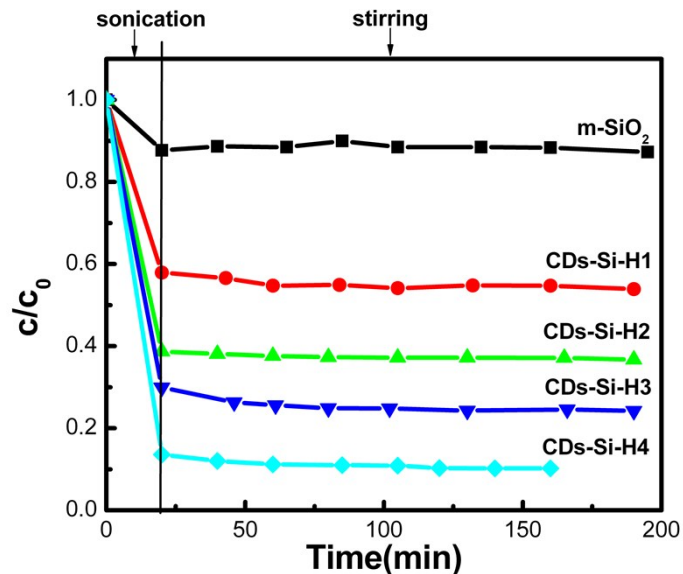

**Fig. S4** relative concentration of Cr(VI) upon sonication and stirring time in the presence of CDs-Si-H powders

### 5. Evaluation the fluorescent quenching of CDs-Si-H1 by Cr(VI)

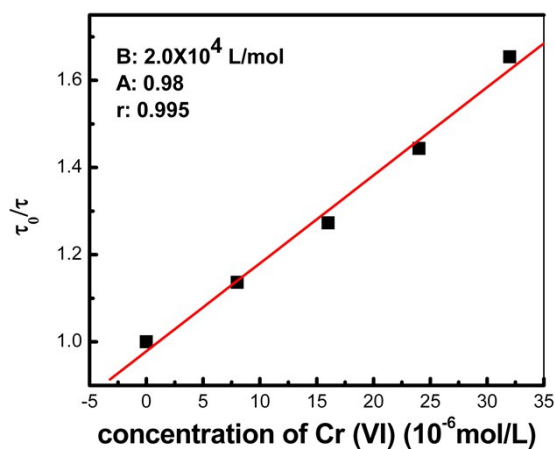

**Fig. S5** Linear relationship between  $\tau_{av0}/\tau_{av}$  and the concentration of Cr(VI).  $\tau_0$  and  $\tau$  is the original fluorescent lifetime and the lifetime in the presence of Cr(VI) of CDs-Si-H1.

With the increase of Cr(VI) concentration, the average fluorescent lifetime ( $\tau_{av}$ ) reduced gradually and fluorescence intensity became weaker and weaker (Fig. 6 and Table 3). A linear relationship existed between  $\tau_{av0}/\tau_{av}$  and the concentration of Cr(VI) with  $K_{sv}$  of  $2.0 \times 10^4$  L/mol, illustrating that the fluorescence quenching induced by Cr(VI) follows dynamic (collisional) quenching mechanism and the quenching constant was close related to diffusion velocity of Cr(VI)

in reaction medium.

#### 6. Color change of CDs-Si-H4 before and after the photocatalytic reaction

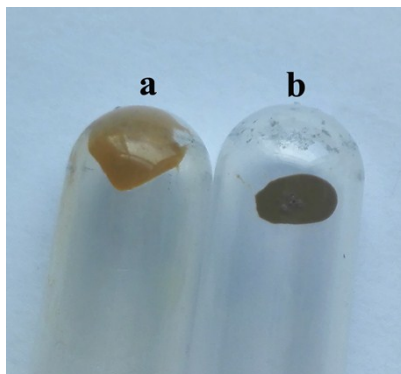

**Fig.S6** Color change of CDs-Si-H4 before (a) and after (b) the photocatalytic reaction

#### 7. Photocatalytic efficiency of CDs-Si-H4 upon recycled times

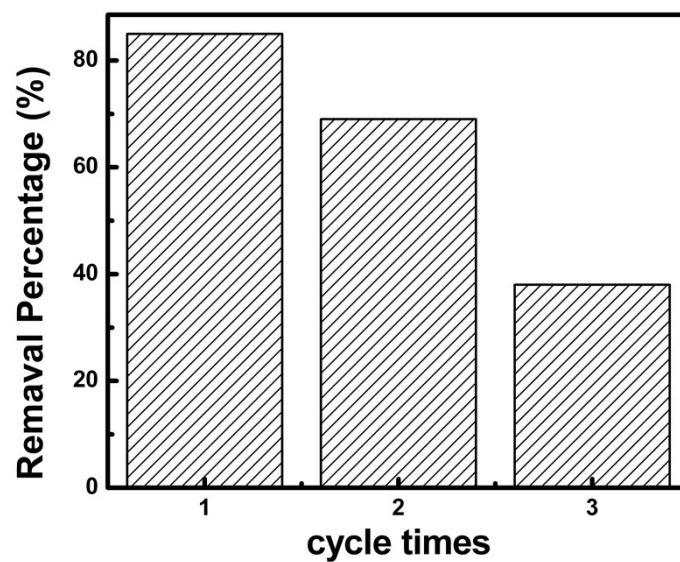

**Fig. S7**, Photo-reduction efficiency of Cr(VI) decreased with the recycle number.
